# Supplementary material for: The distribution and function of human memory T cell subsets in lung cancer
Source: PubMed Central journal article supplement (PMC5440487; doi:10.1007/s12026-016-8882-y), 2017-01-19

Supplementary 3

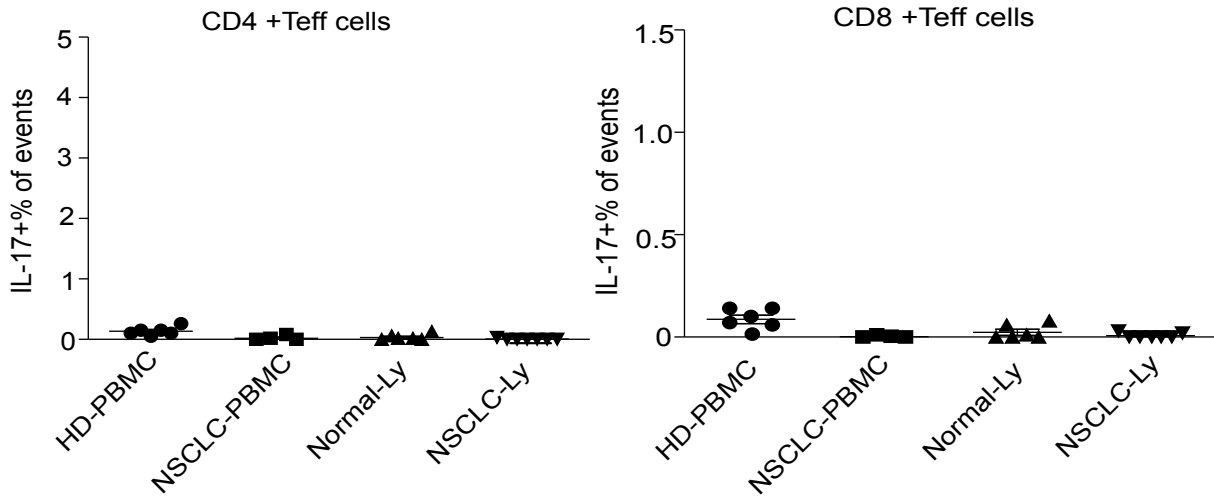

Supplement: 12026_2016_8882_MOESM3_ESM.pdf [file 12026_2016_8882_MOESM3_ESM.pdf]
