# Supplementary material for: The distribution and function of human memory T cell subsets in lung cancer
Source: Springer Nature journal article supplement (doi:10.1007/s12026-016-8882-y), 2017-01-19

Supplementary 4

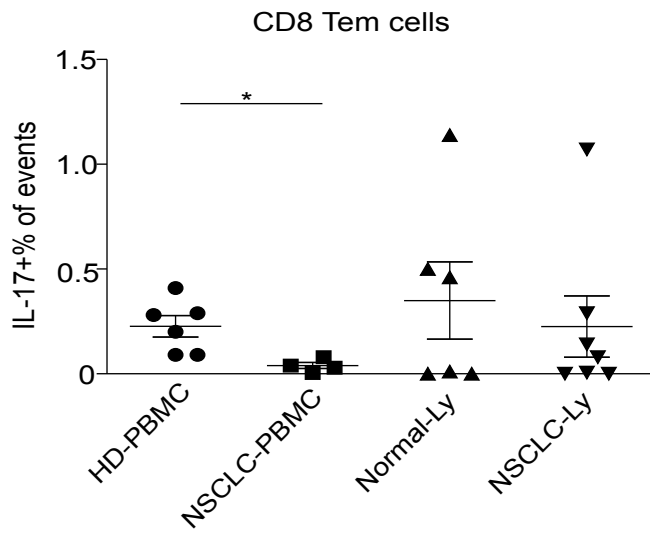

Supplement: MOESM4 [file 12008066]
